# Supplementary material
Source: PubMed Central journal article supplement (PMC4205599)
Supplement: pnas.201404680SI.pdf [file pnas.201404680SI.pdf]

# Supporting Information

Wang et al. 10.1073/pnas.1404680111

## SI Experimental Procedures

**Plant Materials and Growth Conditions.** The *spx1* mutant (M0101661), identified from the Taiwan Rice Insertional Mutants Database (<http://trim.sinica.edu.tw/>), harbors a T-DNA insertion in the second exon of *SPX1*. The *spx2* mutant (PFG\_3A-02559), bought from the Rice T-DNA Insertion Sequence Database ([http://cbi.khu.ac.kr/RISD\\_DB.html](http://cbi.khu.ac.kr/RISD_DB.html)), harbors a T-DNA insertion in the second exon of *SPX2*. Homozygous *spx1* and *spx2* mutants were identified by PCR amplification of the T-DNA flanking regions; RT-PCR detection of mRNA for corresponding genes demonstrated that *spx1* and *spx2* are loss-of-function mutations. The *spx1* and *spx2* mutants were introgressed into the *japonica* rice cultivar Nipponbare through three successive crosses to Nipponbare. The *spx1spx2* double mutant was obtained by crossing *spx2* to *spx1*. The primers used for the identification of mutants are listed in Table S1. Hydroponic experiments were conducted using rice culture solution with NaH<sub>2</sub>PO<sub>4</sub> [0, 10, or 200 μM phosphate (Pi), as indicated]. The nutrient solution was adjusted to pH 5.5 using 1 M NaOH and replaced every 2 d. Experiments were carried out in a greenhouse with a 12-h day (30 °C)/12-h night (22 °C) photoperiod, ~200 μmol·m<sup>-2</sup>·s<sup>-1</sup> photon density, and ~60% humidity.

**Complementation of *spx1* and *spx2* Mutants.** For complementation of the *spx1* and *spx2* mutants, genomic fragments containing the promoter, 5' UTR, and full-length sequences coding SPX1 and SPX2, respectively, were cloned and inserted into the pBI101.3 vector (1). Constructs for *spx1* and *spx2* complementation were introduced into mutants using *Agrobacterium*-mediated transformation. Primers used are listed in Table S1.

**Yeast Two-Hybrid Assays.** The Matchmaker GAL4 two-hybrid system (Clontech) was used for yeast two-hybrid assays. Full-length and truncation derivatives of *SPX1* and *SPX2* (*SPX1*, *SPX2*, *SPX1-N168*, and *SPX2-N164*) were cloned into pGADT7, and the C terminus of the *PHR2* coding sequence (*PHR2-C196*) was cloned into pGBKT7. Primers used are listed in Table S1. Constructs were cotransformed in the AH109 yeast strain. Medium lacking Leu, Trp, His, and Ade was used for selection.

**Coimmunoprecipitation Assays.** The 6×MYC coding sequence amplified from the 35S-MYC vector (2) was cloned into 35S-pCAMBIA1300-mod (3) to generate the 35S-MYC-pCAMBIA1300-mod vector. Full-length and truncation derivatives of *SPX1* and *SPX2* (*SPX1*, *SPX2*, *SPX1-N168*, and *SPX2-N164*) were cloned into the 35S-MYC-pCAMBIA1300-mod vector. Full-length and truncated derivatives of *PHR2* (*PHR2*, *PHR2-N230*, and *PHR2-C196*) were cloned into 35S-FLAG (4). Primers used are listed in Table S1. The constructs were transiently expressed in tobacco leaves by *Agrobacterium* infiltration. The coimmunoprecipitation assays were performed as described (5). Anti-FLAG magnetic beads (Sigma) were used to immunoprecipitate protein complexes, and proteins were detected using an ECL reagent (Millipore) and the ChemDoc XRS system (Bio-Rad).

**Bimolecular Fluorescence Complementation Assays.** Full-length *SPX1* and *SPX2*, as well as full-length *PHR2* and the C terminus of *PHR2* (*PHR2* and *PHR2-C196*), were cloned into C- or N-terminal fragments of YFP vectors (6). Primers used are listed in Table S1. The resulting constructs were transiently expressed in tobacco leaves by *Agrobacterium* infiltration. YFP fluorescence of tobacco leaves was assayed 3 d postinfiltration under a Zeiss LSM710 confocal microscope.

**Subcellular Localization Analysis.** For subcellular localization analysis, truncated derivatives of *SPX1* and *SPX2* were cloned into 35S-mGFP vector (1). Primers used are listed in Table S1. The resulting in-frame fusion constructs were transformed in rice protoplasts for examination of GFP images by confocal microscopy. The 35S-mGFP vector was used as a control. Rice protoplast preparation and transformation were as described (1).

**Development of Genetic Materials.** The *phr2spx1spx2* triple mutants were developed by crossing *phr2* (1) to the *spx1spx2* double mutant. To generate transgenic plants overexpressing *SPX2*, *SPX1-N168*, and *SPX2-N164*, full-length *SPX2* and truncation derivatives of *SPX1* and *SPX2* were cloned into 35S-pCAMBIA1300-mod to generate 35S-*SPX2*, 35S-*SPX1-N168*, and 35S-*SPX2-N164*. These vectors were then introduced into WT rice (Nipponbare) using the *Agrobacterium*-mediated transformation method. *OxPHR2/OxSPX2*, *OxPHR2/OxSPX1-N168*, and *OxPHR2/OxSPX2-N164* were obtained by crossing *OxSPX2*, *OxSPX1-N168-1*, and *OxSPX2-N164-2* to *OxPHR2* (7), respectively.

**RNA Isolation, RT-PCR, and Quantitative RT-PCR Analysis.** RNA isolation, RT-PCR and quantitative RT-PCR (qRT-PCR) analyses were performed as described (8). Primers used for RT-PCR and qRT-PCR analyses are listed in Table S1.

**Microarray Analysis.** Fourteen-day-old plants growth under +phosphorus (P) conditions were treated with +P or -P for another 7 d, and shoots of plants from three biological repeats were sampled for Affymetrix microarray analysis. Microarray and data analysis were performed as described (9). A robust multiarray analysis algorithm was used for summarization of background correction, normalization, and expression levels. Differential expression analysis was performed with the Bayes *t*-statistics using Linear Models for Microarray Data (Limma) software. *P* values were corrected for multiple testing using the Benjamini-Hochberg method (false discovery rate). Genes were considered to be differentially expressed if corrected *P* values were <0.05, and only genes with a signal log ratio more than 1 or less than -1 were considered for further analysis.

**Measurement of Anthocyanin.** Measurement of anthocyanin was performed as described by Jiang et al. (10). Anthocyanin was extracted from the second and third leaves (from the top) of 30-d-old WT, *spx1*, *spx2*, and *spx1spx2* plants grown in +P culture.

**ChIP-PCR Analysis.** To generate *PHR2pro-PHR2-FLAG* transgenic plants, the 3×FLAG coding sequence was amplified from 35S-FLAG to generate FLAG-pBI101.3. A 4.3-kb genomic fragment containing the full-length coding region of *PHR2* was cloned into FLAG-pBI101.3 between the BamHI and KpnI sites. A 2.9-kb genomic fragment containing the promoter and 5' UTR of *PHR2* was cloned upstream of the *PHR2* coding region between the SalI and BamHI sites. The *PHR2pro-PHR2-FLAG* construct was introduced into the *phr2* mutant (1). The *spx1spx2* plants harboring *PHR2pro-PHR2-FLAG* for ChIP-PCR were obtained by crossing *spx1spx2* plants with *PHR2pro-PHR2-FLAG* plants. ChIP-PCR assays were performed as described (11). Primers used for the constructs and ChIP-PCR are listed in Table S1.

**In Vitro Pull-Down Assay.** Full-length *SPX1* and *SPX2* were cloned into pGEX-4T-1 (GE Healthcare). Primers used are listed in Table S1. Recombinant proteins produced in *Escherichia coli* were purified using Glutathione Sepharose 4 Fast Flow (GE Healthcare). *PHR2*-His was purified as described (8). Pull-down

assays were performed as described (5). In brief, pull-down buffer [10 mM Tris-HCl (pH 7.5), 50 mM KCl, 5 mM MgCl<sub>2</sub>, 1 mM DTT, 0.05% Nonidet P-40, and 2.5% (vol/vol) glycerol] was prepared, and NaH<sub>2</sub>PO<sub>4</sub> solution was added or not added to pull-down buffer to 15 mM Pi as indicated. Prokaryotic expressed PHR2-His, GST-SPX1, GST-SPX2, various concentrations of 4× PHOSPHATE STARVATION RESPONSE REGULATOR 1 (PHR1)-binding sequence (P1BS) probe and nickel-nitrilotriacetic acid agarose (Qiagen) were then added into buffer and incubated at 4 °C for 2 h. Pull-down proteins were washed with buffer [50 mM Tris-HCl (pH 7.5), 300 mM NaCl, and 40 mM imidazole] before resolution in 10% (wt/vol) SDS/PAGE and immunoblot analysis using anti-GST antibody (Sigma). Proteins were detected using ECL (Millipore) and the ChemDoc XRS system (Bio-Rad).

**EMSA.** PHR2-His, GST-SPX1, and GST-SPX2 proteins were purified as above. The SPX domains of *SPX1* and *SPX2* (*SPX1-N168* and *SPX2-N164*) were cloned into pGEX-4T-1 (GE Healthcare), and recombinant proteins were purified as the full length of *SPX1* and *SPX2*. Primers used are listed in Table S1. For nuclear protein EMSA, 20-d-old WT, *phr2*, *spx1*, *spx2*, and *spx1spx2* cultured under Pi-sufficient conditions were sampled, and nuclear proteins were extracted using a Plant Nuclei Isolation/Extraction Kit (Sigma) with 3% (vol/vol) of Triton X-100 added to the extraction buffer. DNA fragments containing P1BS of *SPX1*, *SPX2*, and *IPS1* promoters or 5' UTR were amplified using biotin-labeled primers (Table S1) and purified with a PCR

purification kit (Qiagen). The 4× P1BS probe containing four tandem copies of P1BS was generated as described (9). EMSA was performed with a LightShift Chemiluminescent EMSA Kit (Pierce). Pi (NaH<sub>2</sub>PO<sub>4</sub> solution, pH 7.5) was added to EMSA buffer to a final concentration as indicated. For nuclear protein EMSA, 500 ng of nuclear protein of each sample and 100 fmol of biotin-labeled primers were used. Migration of biotin-labeled probes was detected using ECL (Pierce) and ChemDoc XRS (Bio-Rad). Immunoblot analysis using Anti-Histone H3 antibody (Abcam) was used as a loading control.

**Immunoblotting Analysis.** To obtain *SPX1pro-SPX1-MYC* and *SPX2pro-SPX2-MYC* transgenic plants, the 6×MYC coding sequence (amplified from 35S-MYC) was used to replace the *GFP* coding sequence in GFP-pBI101.3 (12) to generate the MYC-pBI101.3 vector. Genomic fragments containing the promoter, 5' UTR, and full-length coding region of *SPX1* and *SPX2* were cloned into MYC-pBI101.3. Constructs were introduced into corresponding mutants by *Agrobacterium*-mediated transformation. Primers used are listed in Table S1. For immunoblot analysis of SPX1 and SPX2, *SPX1pro-SPX1-MYC* and *SPX2pro-SPX2-MYC* seedlings were sampled and ground in liquid nitrogen and dissolved in protein lysis buffer [50 mM Tris-HCl (pH 7.5), 150 mM NaCl, 1 mM EDTA, 10% (vol/vol) glycerol, 1% Triton X-100, 1 mM PMSF, 10 μM MG132, and complete protease inhibitor (Roche)]. Total protein (40 μg) of each sample was separated on SDS/PAGE. Immunoblot analysis was performed using rabbit anti-MYC antibody to detect SPX1-MYC and SPX2-MYC.

- Chen J, et al. (2011) OsPHF1 regulates the plasma membrane localization of low- and high-affinity inorganic phosphate transporters and determines inorganic phosphate uptake and translocation in rice. *Plant Physiol* 157(1):269–278.
- Hong GJ, Xue XY, Mao YB, Wang LJ, Chen XY (2012) *Arabidopsis* MYC2 interacts with DELLA proteins in regulating sesquiterpene synthase gene expression. *Plant Cell* 24(6):2635–2648.
- Wang C, et al. (2009) Involvement of OsSPX1 in phosphate homeostasis in rice. *Plant J* 57(5):895–904.
- Menon S, Rubio V, Wang X, Deng X-W, Wei N (2005) Purification of the COP9 signalosome from porcine spleen, human cell lines, and *Arabidopsis thaliana* plants. *Methods Enzymol* 398:468–481.
- Feng S, et al. (2008) Coordinated regulation of *Arabidopsis thaliana* development by light and gibberellins. *Nature* 451(7177):475–479.
- Shen Q, et al. (2011) Tomato SlSnRK1 protein interacts with and phosphorylates βC1, a pathogenesis protein encoded by a geminivirus β-satellite. *Plant Physiol* 157(3):1394–1406.
- Zhou J, et al. (2008) OsPHR2 is involved in phosphate-starvation signaling and excessive phosphate accumulation in shoots of plants. *Plant Physiol* 146(4):1673–1686.
- Liu F, et al. (2010) OsSPX1 suppresses the function of OsPHR2 in the regulation of expression of *OsPT2* and phosphate homeostasis in shoots of rice. *Plant J* 62(3):508–517.
- Bustos R, et al. (2010) A central regulatory system largely controls transcriptional activation and repression responses to phosphate starvation in *Arabidopsis*. *PLoS Genet* 6(9):e1001102.
- Jiang C, Gao X, Liao L, Harberd NP, Fu X (2007) Phosphate starvation root architecture and anthocyanin accumulation responses are modulated by the gibberellin-DELLA signaling pathway in *Arabidopsis*. *Plant Physiol* 145(4):1460–1470.
- Saleh A, Alvarez-Venegas R, Avramova Z (2008) An efficient chromatin immunoprecipitation (ChIP) protocol for studying histone modifications in *Arabidopsis* plants. *Nat Protoc* 3(6):1018–1025.
- Kang B, et al. (2013) OsCYP2, a chaperone involved in degradation of auxin-responsive proteins, plays crucial roles in rice lateral root initiation. *Plant J* 74(1):86–97.





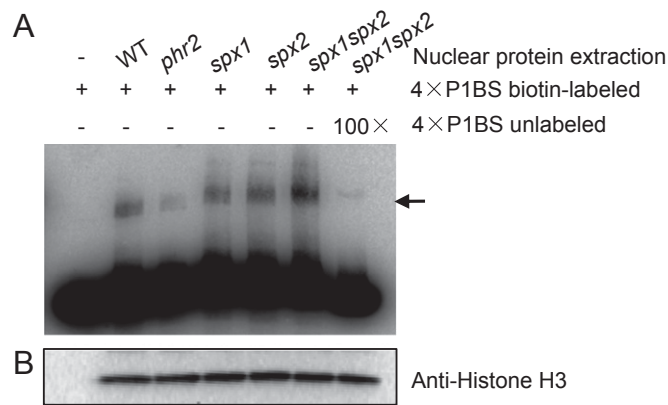

**Fig. S3.** KO of *SPX1* and *SPX2* enhances the P1BS binding ability of PHR2, as revealed by EMSA using nuclear extracted proteins. (A) Results of EMSA using nuclear extracted proteins. (B) Western blot of Anti-Histone H3 antibody to show the equal loading of the nuclear proteins used in EMSA. Twenty-day-old seedlings of WT, *phr2*, *spx1*, *spx2*, and *spx1spx2* plants were used to isolate nuclear proteins for the EMSA assay. The PHR2–DNA complex is indicated by a black arrow.

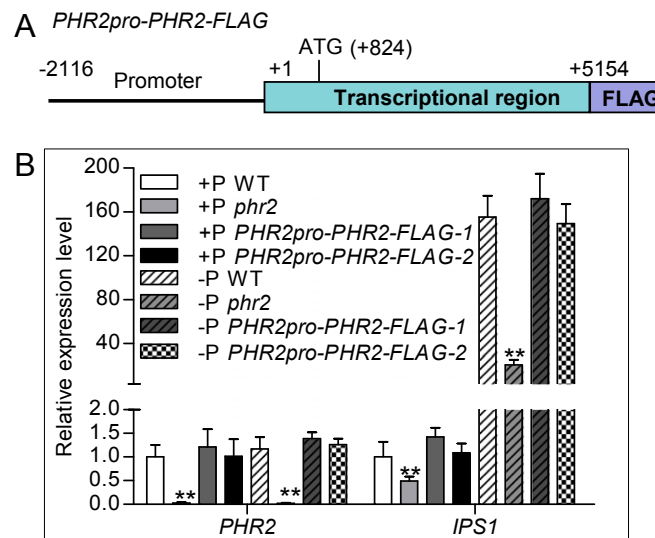

**Fig. S4.** Complementation of *phr2* by *PHR2pro-PHR2-FLAG* fusions. (A) Scheme of *PHR2pro-PHR2-FLAG* constructs. Numbers above the promoter (black line) and transcriptional region (light blue bar) indicate the position from the *PHR2* transcription start site. (B) qRT-PCR analysis of *PHR2* and *IPS1* expression in roots of WT, *phr2*, and two transgenic plants expressing *PHR2pro-PHR2-FLAG* in +P (200  $\mu$ M Pi) and -P conditions. Data show mean + SD ( $n = 3$ ). Data significantly different from WT controls are indicated (\*\* $P < 0.01$ , Student  $t$  test).





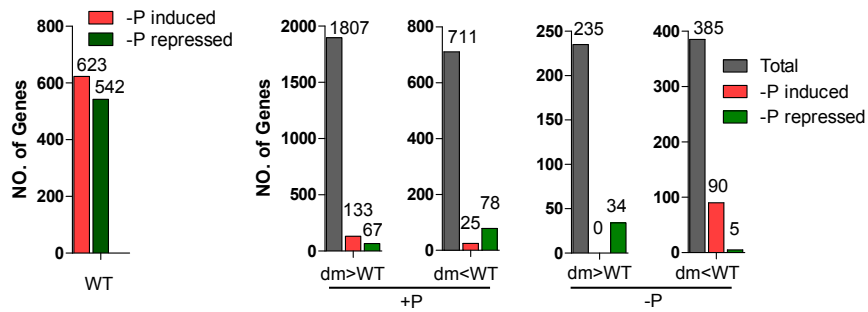

**Fig. S6.** Diagram showing transcriptomic analysis of WT and *spx1spx2* [double-mutant (dm)] plants grown for 14 d and then treated with +P (200  $\mu$ M Pi) or -P (0  $\mu$ M Pi) for 7 d. The total number of genes induced or repressed by Pi starvation in WT plants is shown above the bars (2 $\times$  cutoff, false discovery rate of 0.05). The number of genes whose expression is higher (dm > WT) or lower (dm < WT) in *spx1spx2* plants than in WT plants in each growth condition is also shown. The number of Pi starvation-responsive genes (-Pi induced and -Pi repressed) among them is indicated. Three biological replicates were analyzed.

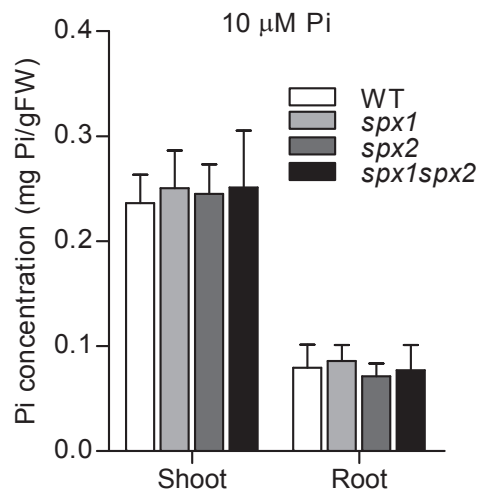

**Fig. S7.** Shoot and root cellular Pi concentrations in 30-d-old WT, *spx1*, and *spx2* single mutant plants and *spx1spx2* double-mutant plants grown in Pi-deficient (10  $\mu$ M Pi) conditions. Data show mean + SD ( $n = 5$ ).
